# Supplementary material for: Development of a unique Niδ+ (0 < δ < 2) in NiMoP/Al2O3 catalyst for dry reforming of methane
Source: Royal Society of Chemistry journal article supplement (doi:10.1039/d2cy01595a), 2022-11-15
Supplement: d2cy01595a1.pdf [file d2cy01595a1.pdf]

## Supplementary Information

### Development of a unique $\text{Ni}^{\delta+}$ ( $0 < \delta < 2$ ) in $\text{NiMoP}/\text{Al}_2\text{O}_3$ catalyst for dry reforming of methane

Yuwei Zhu, Wei Ding\* and Zhiwei Yao\*

School of Petrochemical Engineering, Liaoning Petrochemical University, Fushun,  
113001, P.R. China.

Corresponding author: Wei Ding (E-mail: [cicy1125@163.com](mailto:cicy1125@163.com)) and Zhiwei Yao (E-mail: [mezhiwei@163.com](mailto:mezhiwei@163.com))

### Results

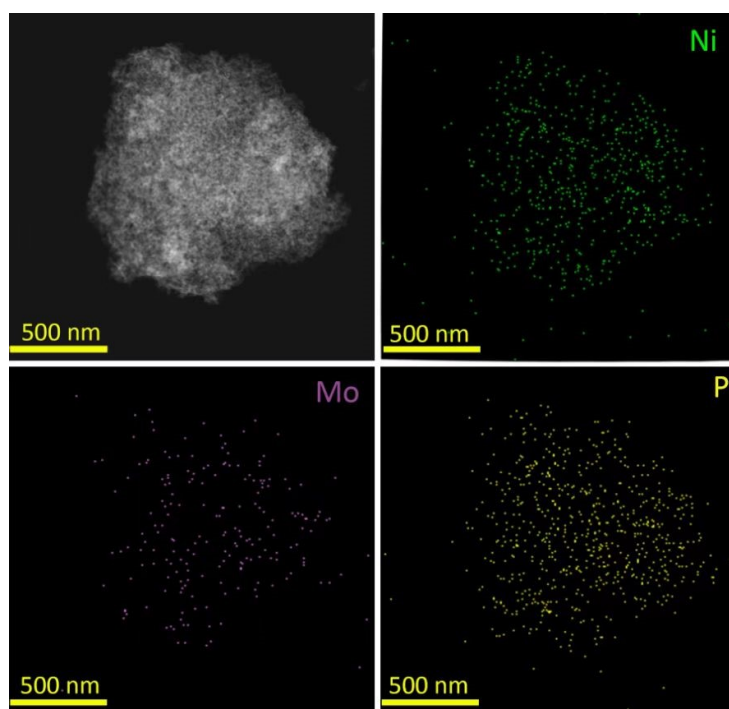

Fig. S1 EDS-mapping images of 1.86NiMoP catalyst.

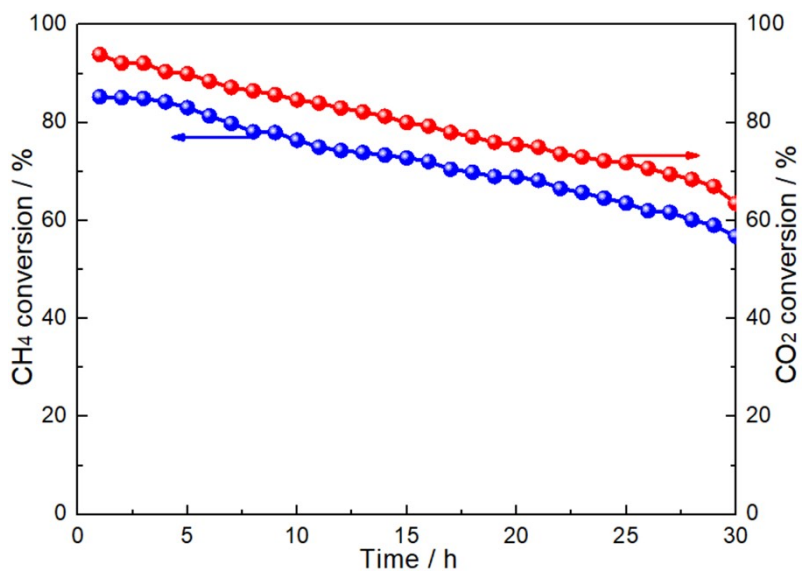

Fig. S2 Time dependence of catalytic performance over 1.86NiMo catalyst at various reaction temperatures. Reaction conditions:  $\text{CH}_4:\text{CO}_2=1:1$ ,  $\text{WHSV}=24000 \text{ cm}^3 \text{ g}^{-1} \text{ h}^{-1}$ , reaction pressure=1 atm, reaction temperature=750 °C.

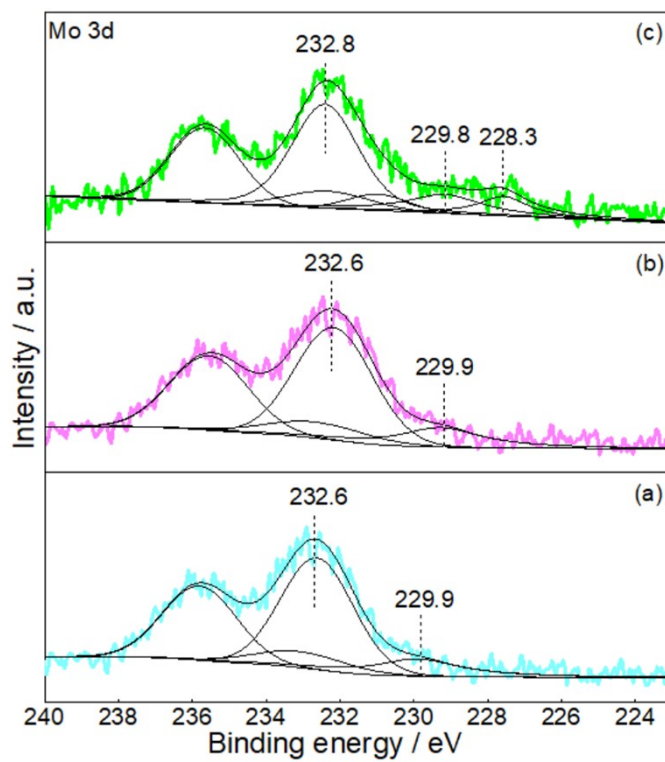

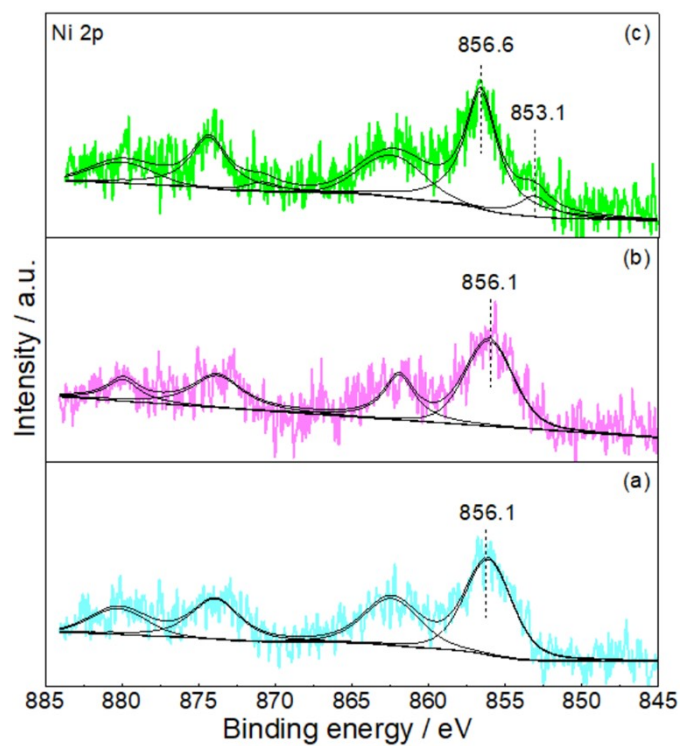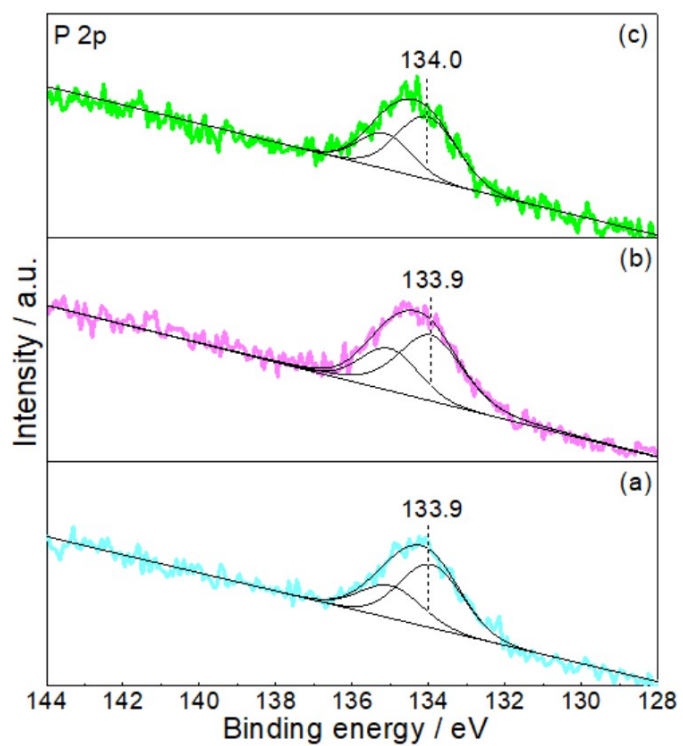

Fig. S3 XPS spectra of Mo 3d, Ni 2P and P 2p (a) 1.86NiMoP-650, (b) 1.86NiMoP-700 and (c) 1.86NiMoP-750.
